# Supplementary material for: Establishment of an indirect ELISA for detection of the novel antifibrotic peptide M10
Source: PubMed Central journal article supplement (PMC5703532; doi:10.1371/journal.pone.0188588), 2017-11-27
Supplement: pone.0188588.s001.pdf [file pone.0188588.s001.pdf]

Primary antibody dilutions

| M10 concentration (ng/ml) | Primary antibody dilutions, Mean OD from triplicates |       |        |        |         |
|---------------------------|------------------------------------------------------|-------|--------|--------|---------|
|                           | 1: 500                                               | 1:600 | 1: 700 | 1: 800 | 1: 1000 |
| 0                         | 0.122                                                | 0.184 | 0.144  | 0.265  | 0.142   |
| 31.25                     | 0.329                                                | 0.53  | 0.281  | 0.379  | 0.395   |
| 62.5                      | 0.387                                                | 0.918 | 0.314  | 0.639  | 0.465   |
| 125                       | 0.526                                                | 1.02  | 0.417  | 0.741  | 0.485   |
| 250                       | 0.622                                                | 1.271 | 0.552  | 0.878  | 0.594   |
| 500                       | 0.716                                                | 1.33  | 0.566  | 1.031  | 0.599   |

Secondary antibody dilutions and conditions

| M10 concentration (ng/ml) | Secondary antibody dilutions, Mean OD from triplicates |          |                    |                  |
|---------------------------|--------------------------------------------------------|----------|--------------------|------------------|
|                           | 1: 10000                                               | 1: 20000 | 1:20000 + 2.5% BSA | 1:20000 + 5% BSA |
| 0                         | 0.122                                                  | 0.091    | 0.063              | 0.114            |
| 15.6                      | 0.194                                                  | 0.11     | 0.137              | 0.265            |
| 31.25                     | 0.329                                                  | 0.154    | 0.262              | 0.38             |
| 62.5                      | 0.387                                                  | 0.186    | 0.437              | 0.493            |
| 125                       | 0.526                                                  | 0.274    | 0.59               | 0.607            |
| 250                       | 0.622                                                  | 0.264    | 0.573              | 0.885            |
| 500                       | 0.716                                                  | 0.343    | 1.125              | 0.907            |

5 independent experiments data set

| M10 concentration (ng/ml) | Mean OD from triplicates |              |              |              |              |
|---------------------------|--------------------------|--------------|--------------|--------------|--------------|
|                           | Experiment 1             | Experiment 2 | Experiment 3 | Experiment 4 | Experiment 5 |
| 0.01                      | 0.3                      | 0.1          | 0.09         | 0.1          | 0.14         |
| 15.6                      | 1.07                     | 0.79         | 0.71         | 1.06         | 0.58         |
| 31.25                     | 1.79                     | 1.43         | 1.00         | 1.38         | 1.17         |
| 62.5                      | 2.24                     | 2.06         | 1.88         | 2.06         | 1.4          |
| 125                       | 2.56                     | 2.1          | 2.11         | 2.36         | 1.96         |
| 250                       | 2.75                     | 2.48         | 2.55         | 2.59         | 2.49         |

M10 ELISA with mouse plasma  
(each sample run in triplicate, 3 sample / group)

| Time point     | Mean M10 concentration (ng/ml) |
|----------------|--------------------------------|
| 15 min/ 0.25hr | 143                            |
| 30 min/0.5hr   | 320.6                          |
| 1hr            | 604.4                          |
| 2hr            | 1140                           |
| 4hr            | 3592                           |
| 6hr            | 4551                           |
| 12hr           | 3135                           |
| 24hr           | 801.2                          |
| 48hr           | 366.4                          |

Half life calculation of M10 by using protlifeopred software

| Hour | Protein amount (%) |
|------|--------------------|
| 0.1  | 100                |
| 7.2  | 50                 |
| 14.4 | 25                 |
| 21.6 | 12.5               |
| 28.8 | 7                  |
| 36   | 3                  |
| 43.2 | 2                  |
| 50.4 | 1                  |
| 57.6 | 1                  |

Inter-assay Table

| calibrator | Read out mean of Triplicate well | Mean   | std   | Inter-assay variance (%) |
|------------|----------------------------------|--------|-------|--------------------------|
| 50         | 55.03                            | 51.9   | 2.59  | 5.00                     |
|            | 50.67                            |        |       |                          |
|            | 52.80                            |        |       |                          |
|            | 49.06                            |        |       |                          |
| 100        | 94.47                            | 100.03 | 8.02  | 8.01                     |
|            | 93.42                            |        |       |                          |
|            | 101.42                           |        |       |                          |
|            | 110.81                           |        |       |                          |
| 200.0      | 227.60                           | 224.60 | 14.68 | 6.54                     |
|            | 243.98                           |        |       |                          |
|            | 215.85                           |        |       |                          |
|            | 210.98                           |        |       |                          |

Intra-assay Table

| calibrator | Read out mean of Triplicate well | Mean   | std   | intra-assay variance (%) |
|------------|----------------------------------|--------|-------|--------------------------|
| 200        | 238.8                            | 238.52 | 12.53 | 5.25                     |
|            | 216.4                            |        |       |                          |
|            | 237                              |        |       |                          |
|            | 250.2                            |        |       |                          |
|            | 237.7                            |        |       |                          |
|            | 251                              |        |       |                          |
| 100        | 88.7                             | 93.94  | 3.80  | 4.05                     |
|            | 96.8                             |        |       |                          |
|            | 97.9                             |        |       |                          |
|            | 90.35                            |        |       |                          |
|            | 96.7                             |        |       |                          |
|            | 93.2                             |        |       |                          |
| 50         | 59.7                             | 53.05  | 3.36  | 6.34                     |
|            | 54.4                             |        |       |                          |
|            | 50.3                             |        |       |                          |
|            | 55.7                             |        |       |                          |
|            | 48.9                             |        |       |                          |
|            | 48.8                             |        |       |                          |
|            | 54.3                             |        |       |                          |
|            | 51.7                             |        |       |                          |
|            | 54.4                             |        |       |                          |
|            | 52.3                             |        |       |                          |

Recovery Table

| concentration | recovery | avg recovery | SE  |
|---------------|----------|--------------|-----|
| 15.6          | 110.0    | 89.94        | 7.3 |
|               | 78.0     |              |     |
|               | 74.6     |              |     |
|               | 90.1     |              |     |
|               | 97.0     |              |     |
| 31.25         | 112.8    | 112.98       | 7.5 |
|               | 114.7    |              |     |
|               | 138.9    |              |     |
|               | 92.8     |              |     |
|               | 105.7    |              |     |
| 62.5          | 101.6    | 95.22        | 2.2 |
|               | 96.1     |              |     |
|               | 96.1     |              |     |
|               | 88.1     |              |     |
|               | 94.2     |              |     |
| 125           | 79.5     | 101.56       | 6.9 |
|               | 111.6    |              |     |
|               | 95.9     |              |     |
|               | 101.4    |              |     |
|               | 119.5    |              |     |
| 250           | 100.0    | 105.96       | 2.8 |
|               | 102.1    |              |     |
|               | 107.7    |              |     |
|               | 114.0    |              |     |

Limit of detection (LOD)

| Blank value(mean of triplicate) | avg (ng/ml) | STD  | LOD (ng/ml) |
|---------------------------------|-------------|------|-------------|
| 0.86                            |             |      |             |
| 5.6                             |             |      |             |
| 4.3                             | 2.45        | 2.39 | 9.61        |
| 0                               |             |      |             |
| 1.5                             |             |      |             |

PK study data set\_mouse plasma table

| Time point     | Mean M10 concentration (ng/ml) |        |
|----------------|--------------------------------|--------|
|                | set 1                          | set 2  |
| 15 min/ 0.25hr | 143                            | 451    |
| 30 min/0.5hr   | 320.6                          | 763    |
| 1hr            | 604.4                          | 3345   |
| 2hr            | 1140                           | 4005   |
| 4hr            | 3592                           | 4691.7 |
| 6hr            | 4551                           | 4873.4 |
| 12hr           | 3135                           | 1388.4 |
| 24hr           | 801.2                          | 1216   |
| 48hr           | 366.4                          | 143.4  |
