# Supplementary material for: Establishment of an indirect ELISA for detection of the novel antifibrotic peptide M10
Source: PubMed Central journal article supplement (PMC5703532; doi:10.1371/journal.pone.0188588), 2017-11-27
Supplement: pone.0188588.s002.pdf [file pone.0188588.s002.pdf]

### Unknowns Dilution

| Sample | Wells | Values | R | Result | MeanResult | Std.Dev. | CV% | Dilution | Adj.Result |
|--------|-------|--------|---|--------|------------|----------|-----|----------|------------|
|--------|-------|--------|---|--------|------------|----------|-----|----------|------------|

R - Outside standard range

Mean Adjusted Result:

### Control

| Sample | Wells | Sample# | Values | MeanValue |
|--------|-------|---------|--------|-----------|
|--------|-------|---------|--------|-----------|

10 → 10500

Primary Ab: 1 → 500 dilution

### Standard Curve

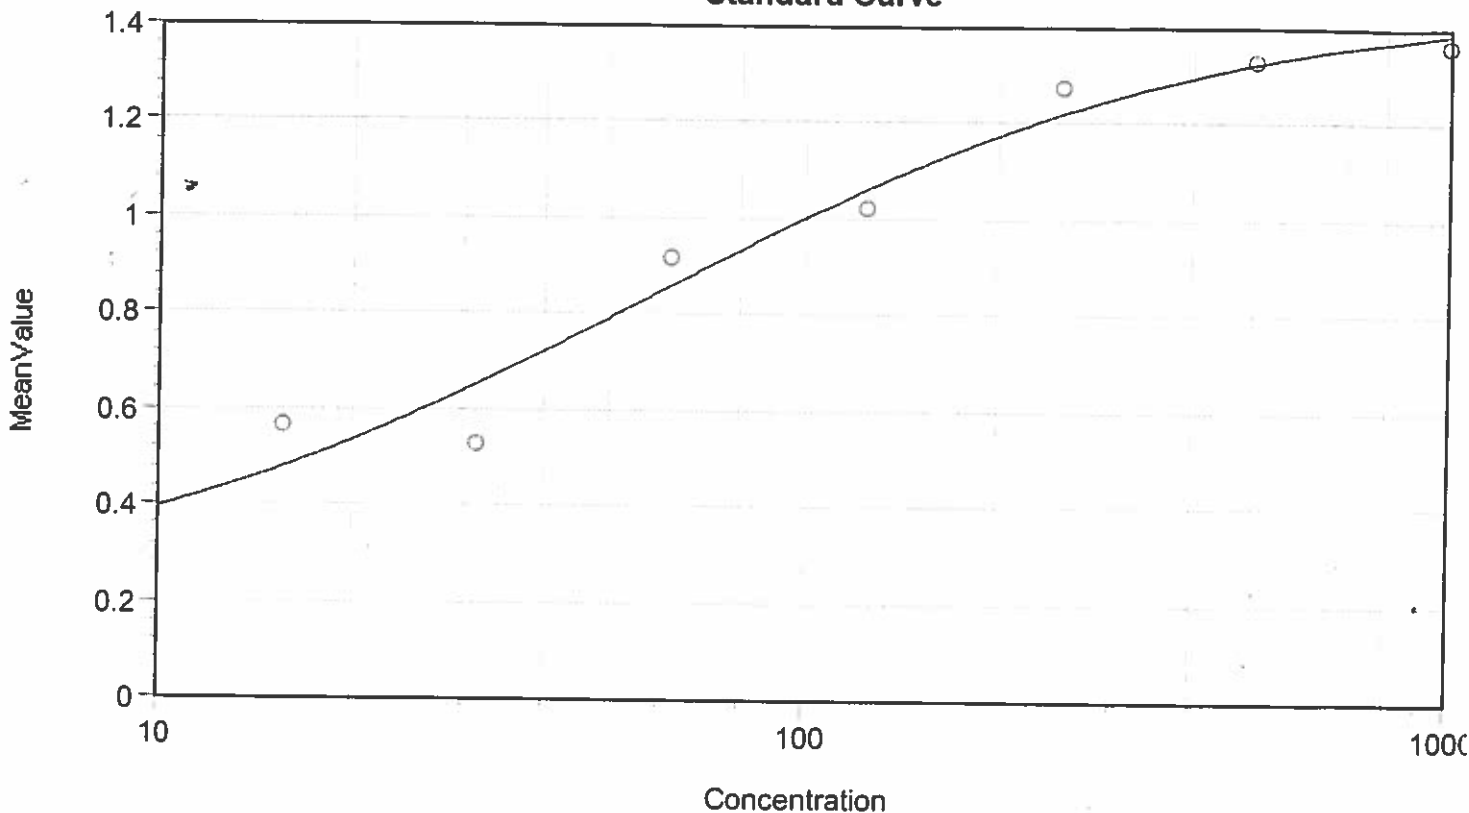

$$y = ((A - D) / (1 + (x/C)^B)) + D$$

|                                             | A     | B     | C      | D     | R <sup>2</sup> |
|---------------------------------------------|-------|-------|--------|-------|----------------|
| Std (Standards: Concentration vs MeanValue) | 0.199 | 0.975 | 56.492 | 1.459 | 0.976          |

### Experiment#2

#### CuvetteSet#1

| A1 | Sa01 |
|----|------|
|    |      |

Data: No Data  
Ref: No Reference

| A2 | Sa02 |
|----|------|
|    |      |

Data: No Data  
Ref: No Reference

| A3 | Sa03 |
|----|------|
|    |      |

Data: No Data  
Ref: No Reference

| Endpoint |
|----------|
| Lm1 260  |
| Lm2 280  |

Experiment#1

1:600

Standard Curve

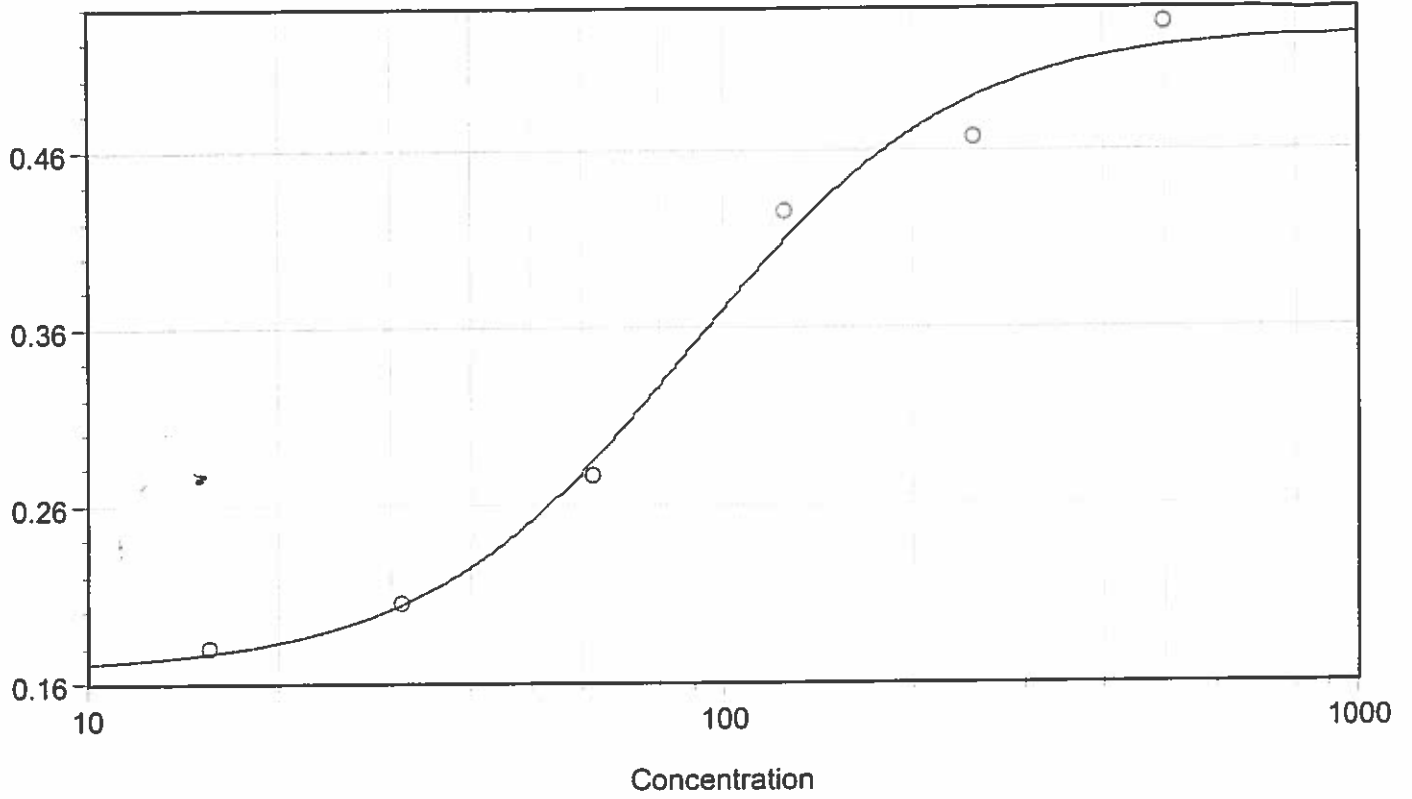

primary 1:10 - 1 -> 600 dilution  
MeanValue

$y = ((A - D)/(1 + (x/C)^B)) + D$

|                                               | <u>A</u> | <u>B</u> | <u>C</u> | <u>D</u> | <u>R<sup>2</sup></u> |
|-----------------------------------------------|----------|----------|----------|----------|----------------------|
| o Std (Standards: Concentration vs MeanValue) | 0.167    | 2.083    | 88.777   | 0.528    | 0.992                |

Primary Ab: 1 → 100 dilution  
 10 Ab = 1:700

### Standard Curve

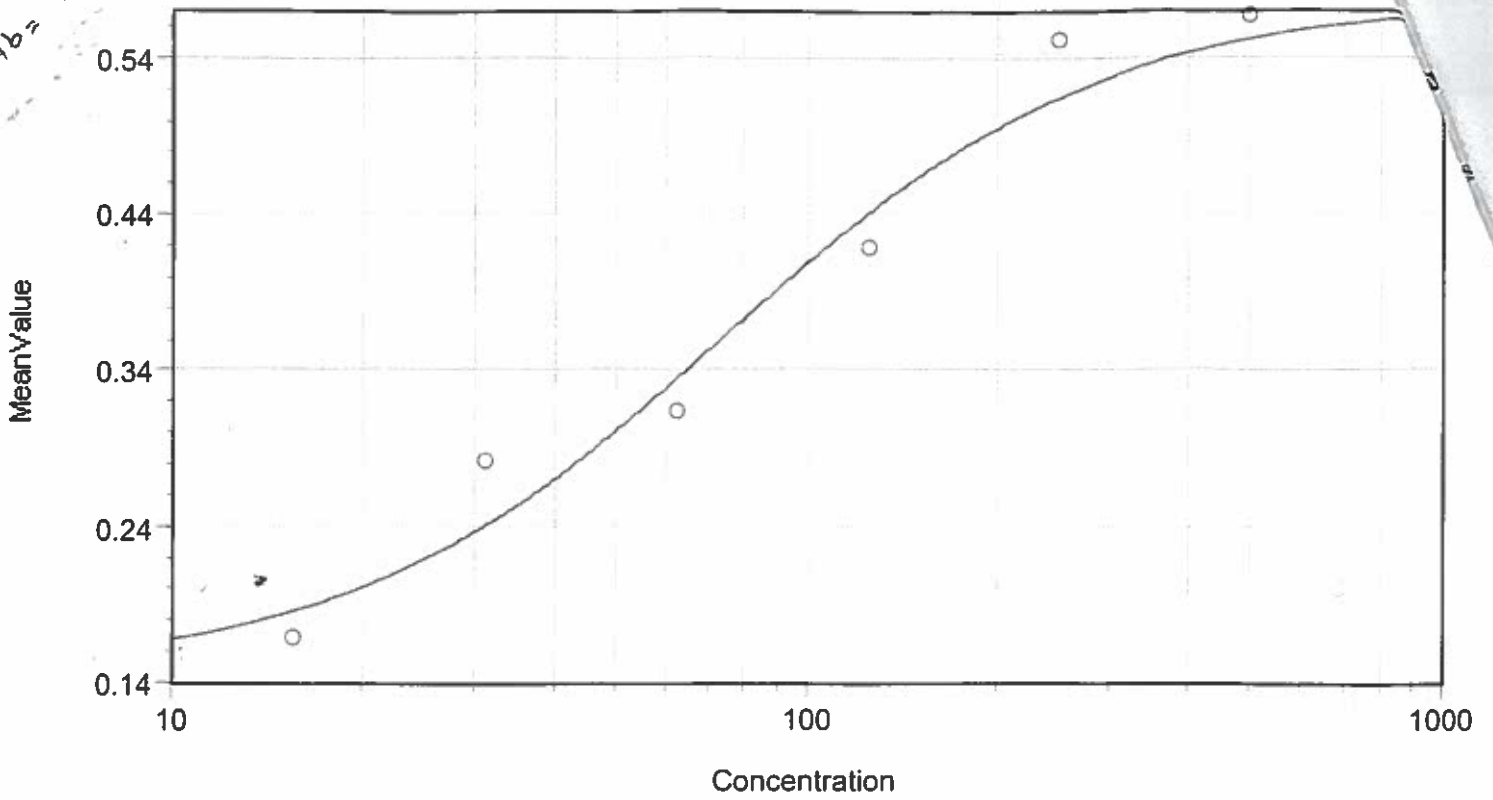

$$y = \left( \frac{A - D}{1 + (x/C)^B} \right) + D$$

|                                              | A     | B     | C      | D     | R <sup>2</sup> |
|----------------------------------------------|-------|-------|--------|-------|----------------|
| Std (Standards: Concentration vs Mean Value) | 0.147 | 1.477 | 73.916 | 0.576 | 0.974          |

### Experiment#2

#### CuvetteSet#1

| A1 | Sa01 |
|----|------|
|    |      |

Data: No Data  
 Ref: No Reference

| A2 | Sa02 |
|----|------|
|    |      |

Data: No Data  
 Ref: No Reference

| A3 | Sa03 |
|----|------|
|    |      |

Data: No Data  
 Ref: No Reference

| Endpoint |     |
|----------|-----|
| Lm1      | 260 |
| Lm2      | 280 |

Wavelength Combination: !Lm1  
 Data Mode: Absorbance

#### Samples

| Sample | Wells | Sample# | OD260 | OD280 |
|--------|-------|---------|-------|-------|
| Sa01   | A1    | 1       |       |       |
| Sa02   | A2    | 2       |       |       |
| Sa03   | A3    | 3       |       |       |

Primary Ab: 1 - 800 dilution

10000

10000 - 10800

### Standard Curve

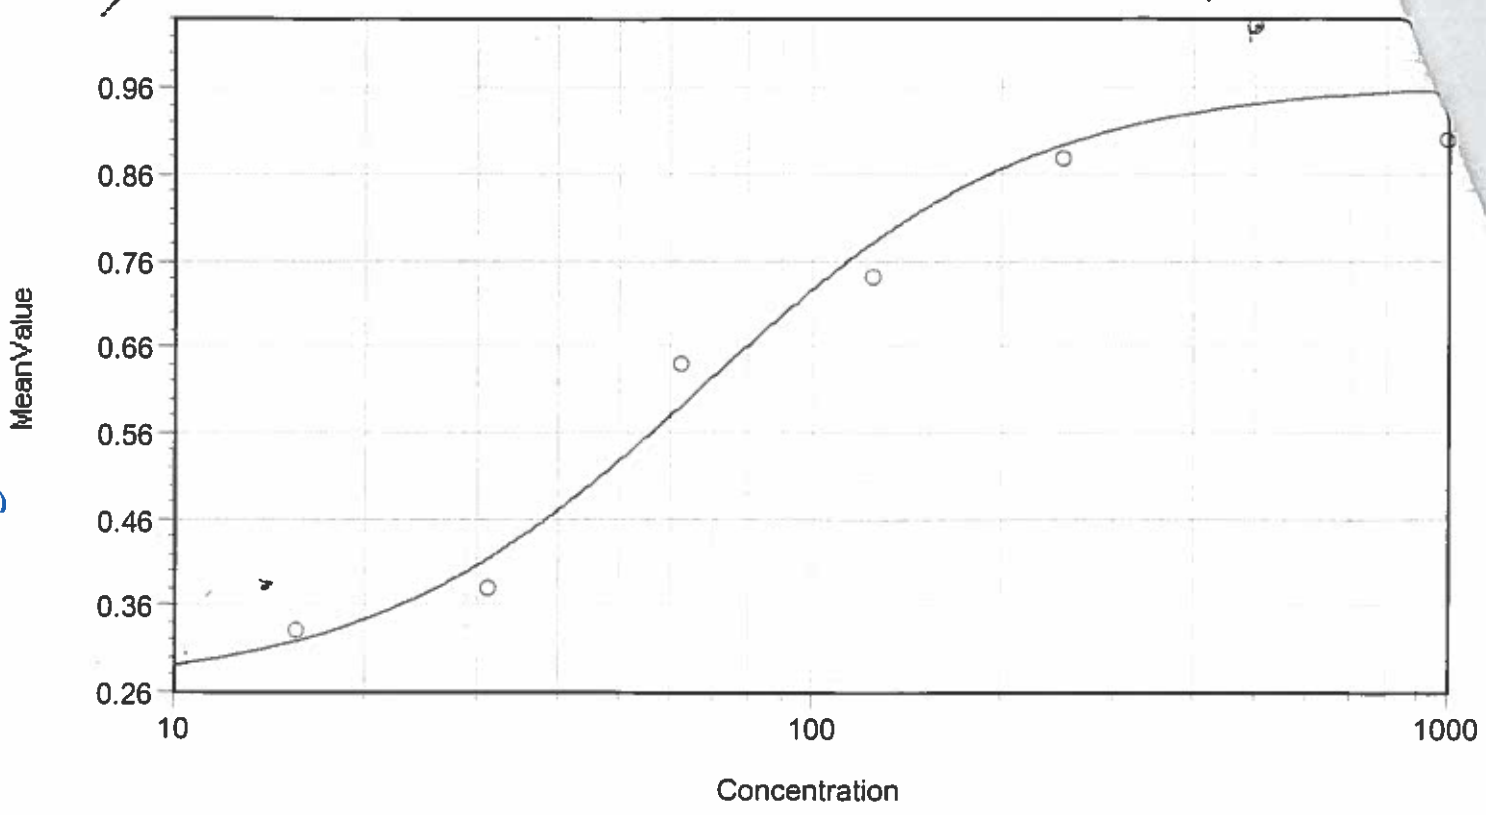

$$y = \left( \frac{A - D}{1 + (x/C)^B} \right) + D$$

○ Std (Standards: Concentration vs MeanValue)      **A**      **B**      **C**      **D**      **R<sup>2</sup>**  
 0.263      1.674      67.689      0.965      0.971

### Experiment#2

#### CuvetteSet#1

|           |             |
|-----------|-------------|
| <b>A1</b> | <b>Sa01</b> |
|           |             |

Data: No Data  
Ref: No Reference

|           |             |
|-----------|-------------|
| <b>A2</b> | <b>Sa02</b> |
|           |             |

Data: No Data  
Ref: No Reference

|           |             |
|-----------|-------------|
| <b>A3</b> | <b>Sa03</b> |
|           |             |

Data: No Data  
Ref: No Reference

|                 |
|-----------------|
| <b>Endpoint</b> |
| Lm1 260         |
| Lm2 280         |

Wavelength Combination: !Lm1  
Data Mode: Absorbance

#### Samples

| Sample | Wells | Sample# | OD260 | OD280 |
|--------|-------|---------|-------|-------|
| Sa01   | A1    | 1       |       |       |
| Sa02   | A2    | 2       |       |       |
| Sa03   | A3    | 3       |       |       |

### Experiment#1

10Ab → 1:1000

4-parametric plot.

### Standard Curve

Primary Ab : 1 → 1000 dilutions  
Mean Value

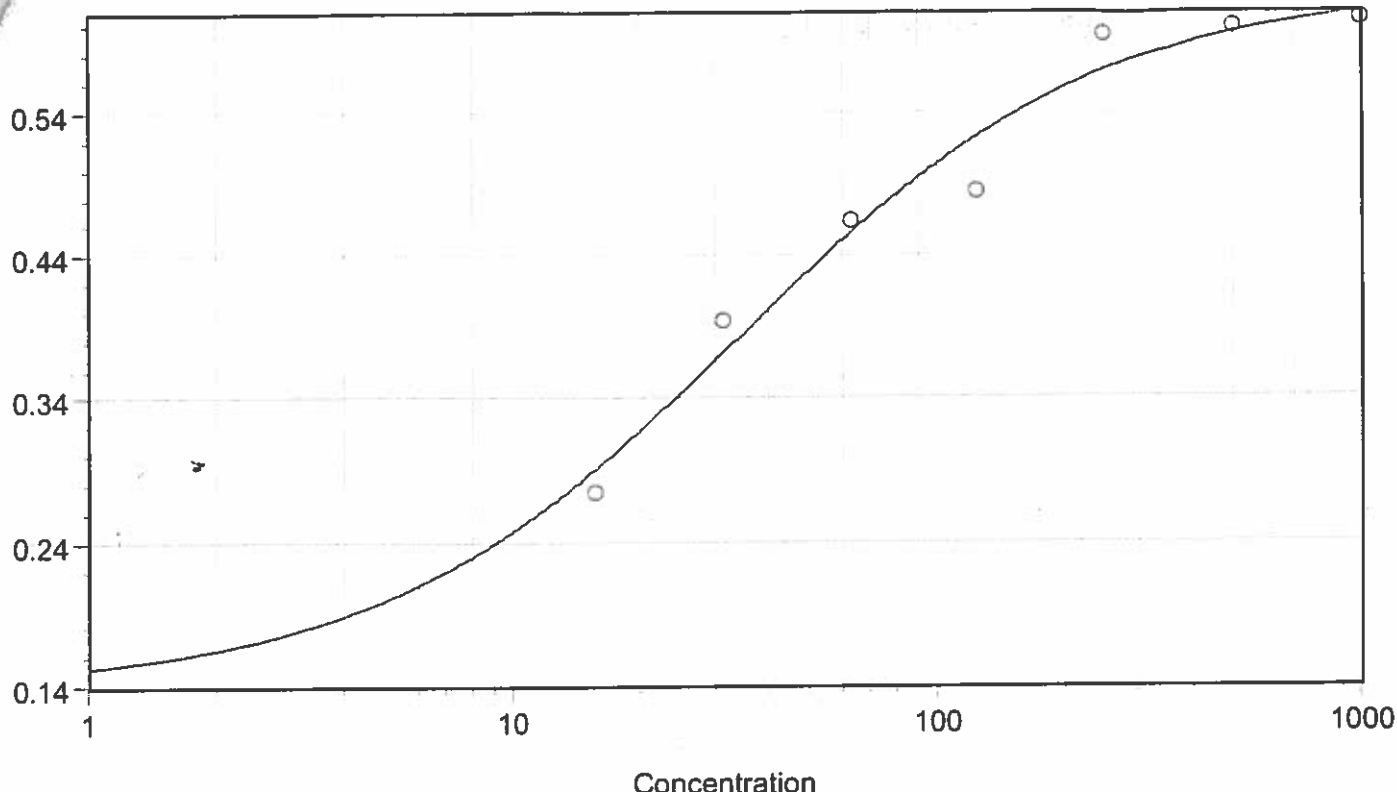

$$y = ((A - D) / (1 + (x/C)^B)) + D$$

|                                                | <u>A</u> | <u>B</u> | <u>C</u> | <u>D</u> | <u>R<sup>2</sup></u> |
|------------------------------------------------|----------|----------|----------|----------|----------------------|
| ○ Std (Standards: Concentration vs Mean Value) | 0.14     | 1.025    | 33.745   | 0.624    | 0.985                |

1:600

### UnknownsDilution

| Sample | Wells | Values | R | Result | MeanResult | Std.Dev. | CV% | Dilution | Adj.Result |
|--------|-------|--------|---|--------|------------|----------|-----|----------|------------|
|--------|-------|--------|---|--------|------------|----------|-----|----------|------------|

R - Outside standard range  
 Mean Adjusted Result:

1° Ab = 1:600  
 2° Ab = 1:10,000

### Control

| Sample | Wells | Sample# | Values | MeanValue |
|--------|-------|---------|--------|-----------|
|--------|-------|---------|--------|-----------|

2° Ab : 1 → 10,000 Dilution

### Standard Curve

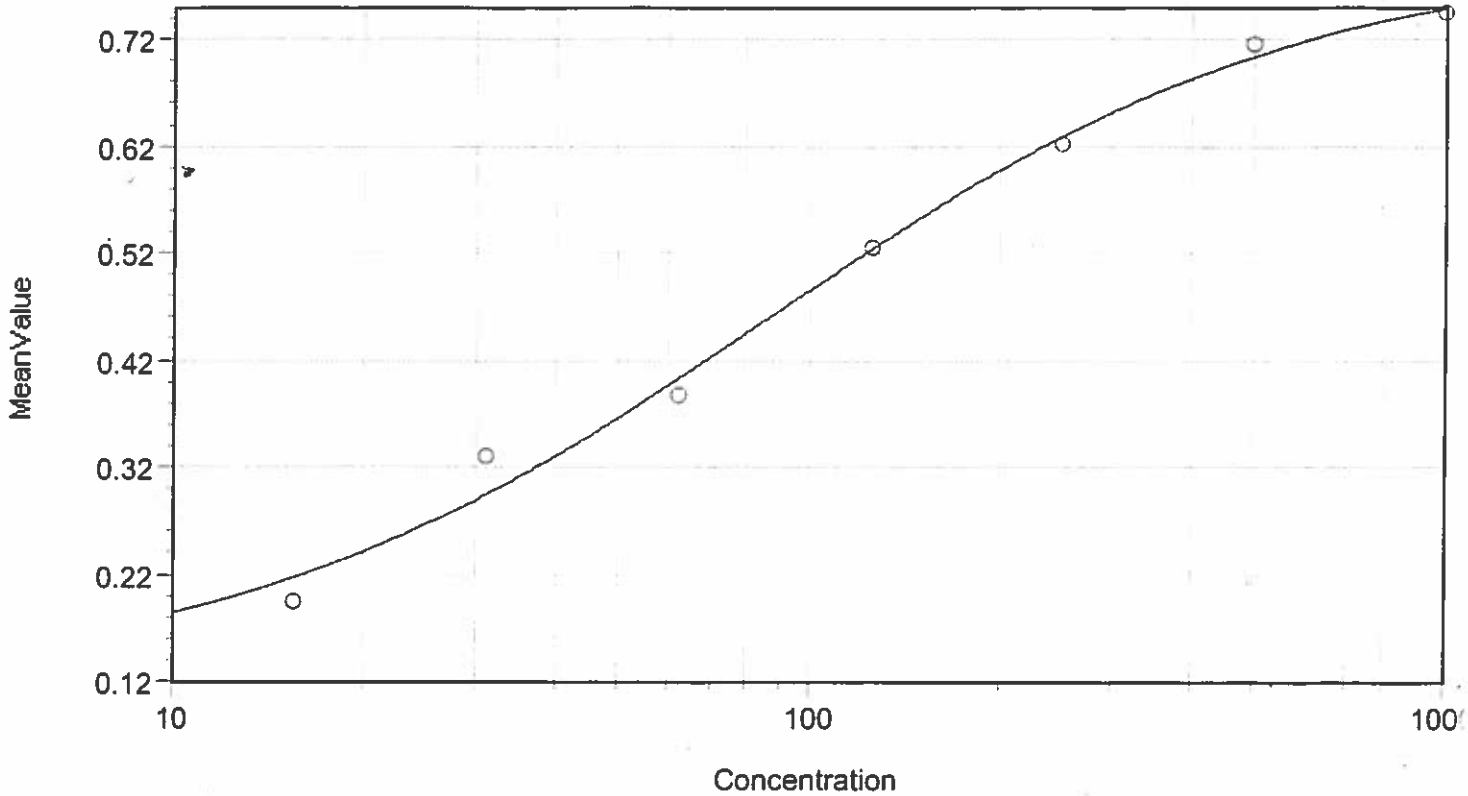

$$y = ((A - D)/(1 + (x/C)^B)) + D$$

|                                             | A     | B     | C      | D     | R <sup>2</sup> |
|---------------------------------------------|-------|-------|--------|-------|----------------|
| Std (Standards: Concentration vs MeanValue) | 0.118 | 1.035 | 85.725 | 0.799 | 0.994          |

### Experiment#2

#### CuvetteSet#1

|    |      |
|----|------|
| A1 | Sa01 |
|----|------|

Data: No Data  
 Ref: No Reference

|    |      |
|----|------|
| A2 | Sa02 |
|----|------|

Data: No Data  
 Ref: No Reference

|    |      |
|----|------|
| A3 | Sa03 |
|----|------|

Data: No Data  
 Ref: No Reference

|          |
|----------|
| Endpoint |
| Lm1 260  |
| Lm2 280  |

### Standard Curve

2° Ab : 1 → 20.000 Dilution  
 1° Ab = 1:1000  
 2° Ab = 1:20.000

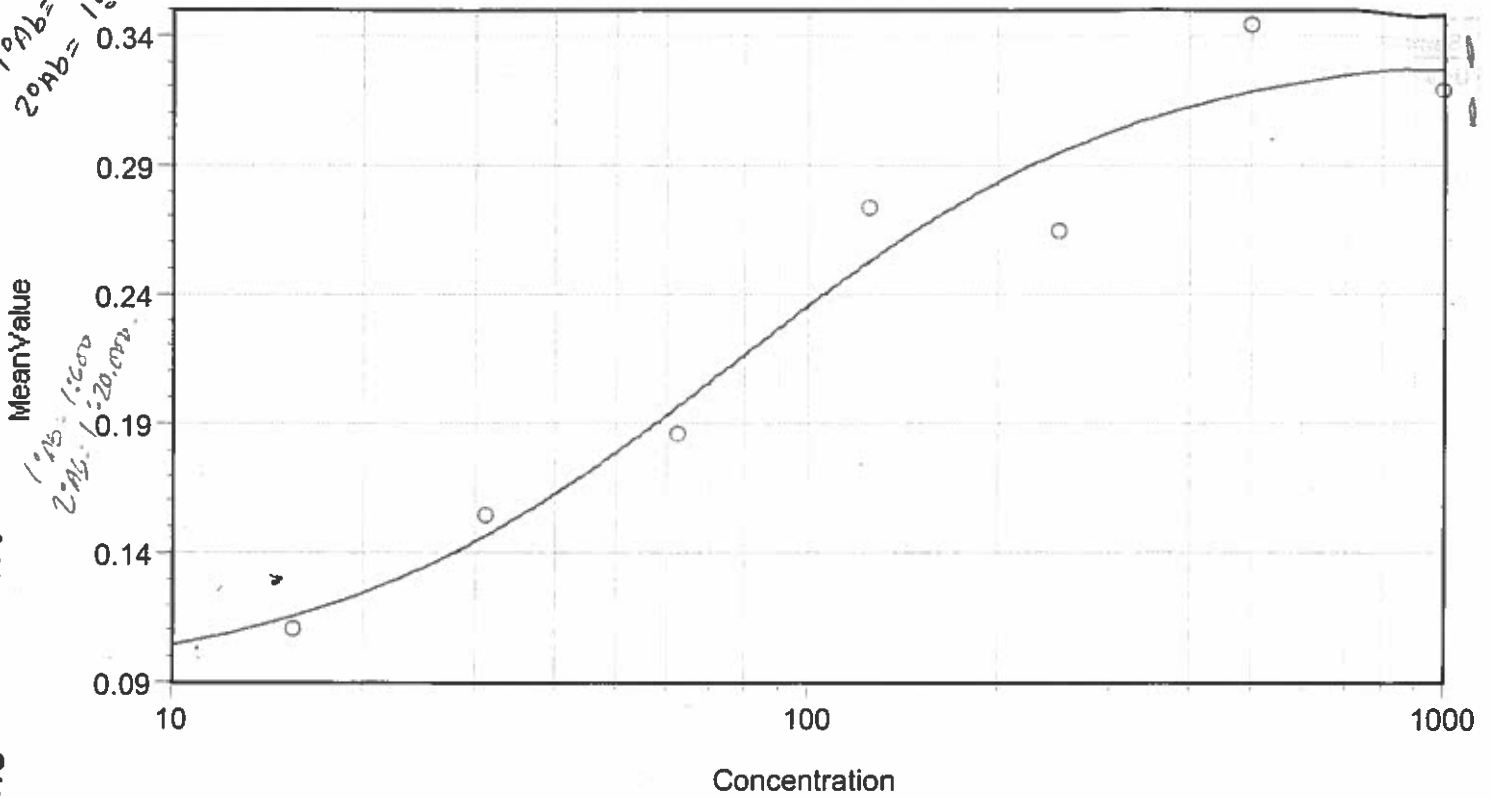

$$y = ( (A - D) / (1 + (x/C)^B) ) + D$$

○ Std (Standards: Concentration vs MeanValue)     
 A      B      C      D      R<sup>2</sup>  
 0.09      1.349      76.193      0.336      0.964

### Experiment#2

#### CuvetteSet#1

|    |      |
|----|------|
| A1 | Sa01 |
|    |      |

Data: No Data  
Ref: No Reference

|    |      |
|----|------|
| A2 | Sa02 |
|    |      |

Data: No Data  
Ref: No Reference

|    |      |
|----|------|
| A3 | Sa03 |
|    |      |

Data: No Data  
Ref: No Reference

|          |     |
|----------|-----|
| Endpoint |     |
| Lm1      | 260 |
| Lm2      | 280 |

Wavelength Combination: !Lm1  
Data Mode: Absorbance

#### Samples

| Sample | Wells | Sample# | OD260 | OD280 |
|--------|-------|---------|-------|-------|
| Sa01   | A1    | 1       |       |       |
| Sa02   | A2    | 2       |       |       |
| Sa03   | A3    | 3       |       |       |

2° Ab: 1 → 20,000 + 2.5% BSA.

### Standard Curve

1° - 650  
2° - 20,000 + 2.5% BSA

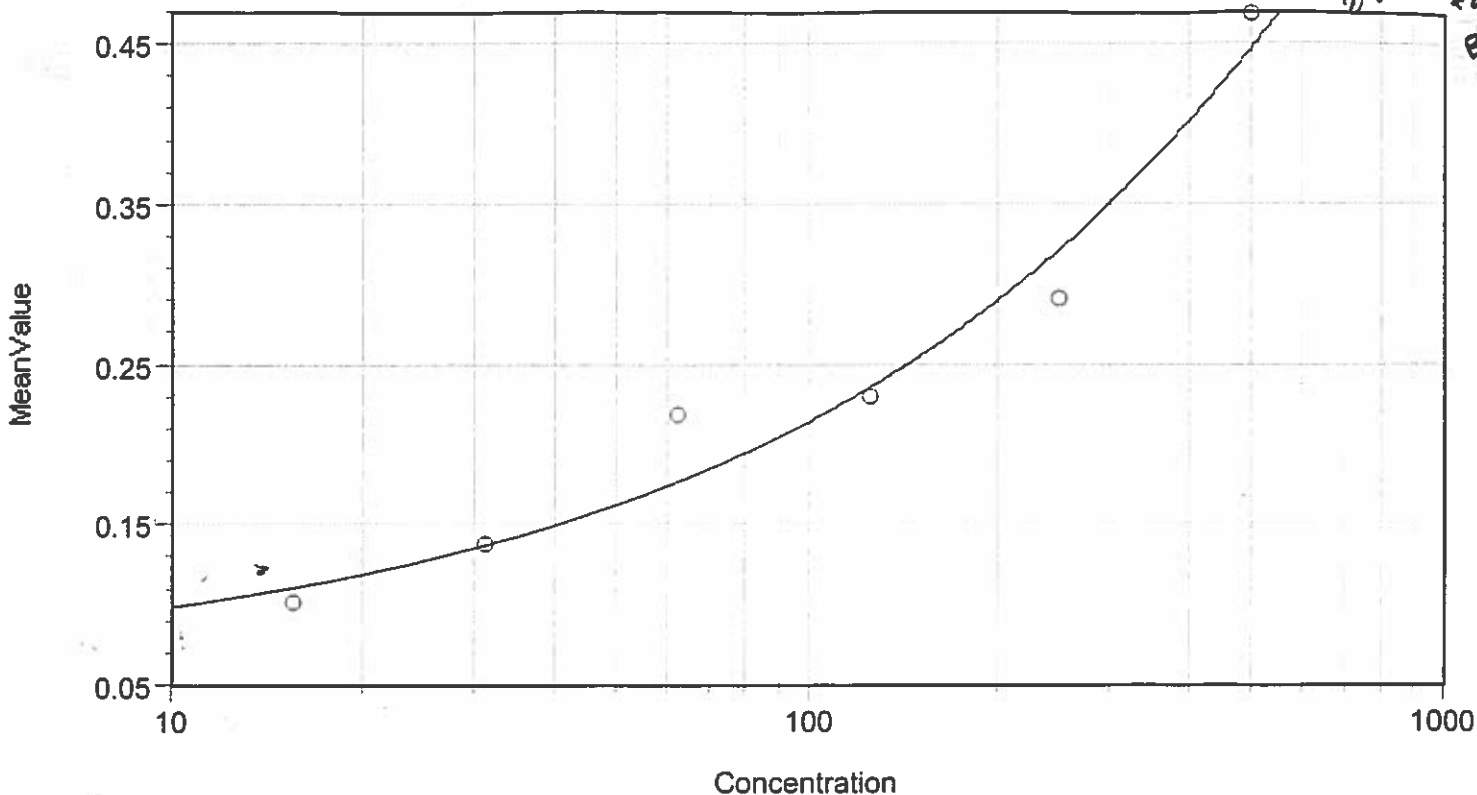

$$y = \left( \frac{A - D}{1 + (x/C)^B} \right) + D$$

○ Std (Standards: Concentration vs Mean Value)      A: 0.06      B: 0.613      C: 21294.52      D: 4.319      R<sup>2</sup>: 0.972

### Experiment#2

#### CuvetteSet#1

|    |      |
|----|------|
| A1 | Sa01 |
|    |      |

Data: No Data  
Ref: No Reference

|    |      |
|----|------|
| A2 | Sa02 |
|    |      |

Data: No Data  
Ref: No Reference

|    |      |
|----|------|
| A3 | Sa03 |
|    |      |

Data: No Data  
Ref: No Reference

|          |
|----------|
| Endpoint |
| Lm1 260  |
| Lm2 280  |

Wavelength Combination: !Lm1

Data Mode: Absorbance

#### Samples

| Sample | Wells | Sample# | OD260 | OD280 |
|--------|-------|---------|-------|-------|
| Sa01   | A1    | 1       |       |       |
| Sa02   | A2    | 2       |       |       |
| Sa03   | A3    | 3       |       |       |



2010-1-16  
15:12

### Standard Curve

2\*Ab: 1 -> 20,000 + 5% BSA.  
MeanValue

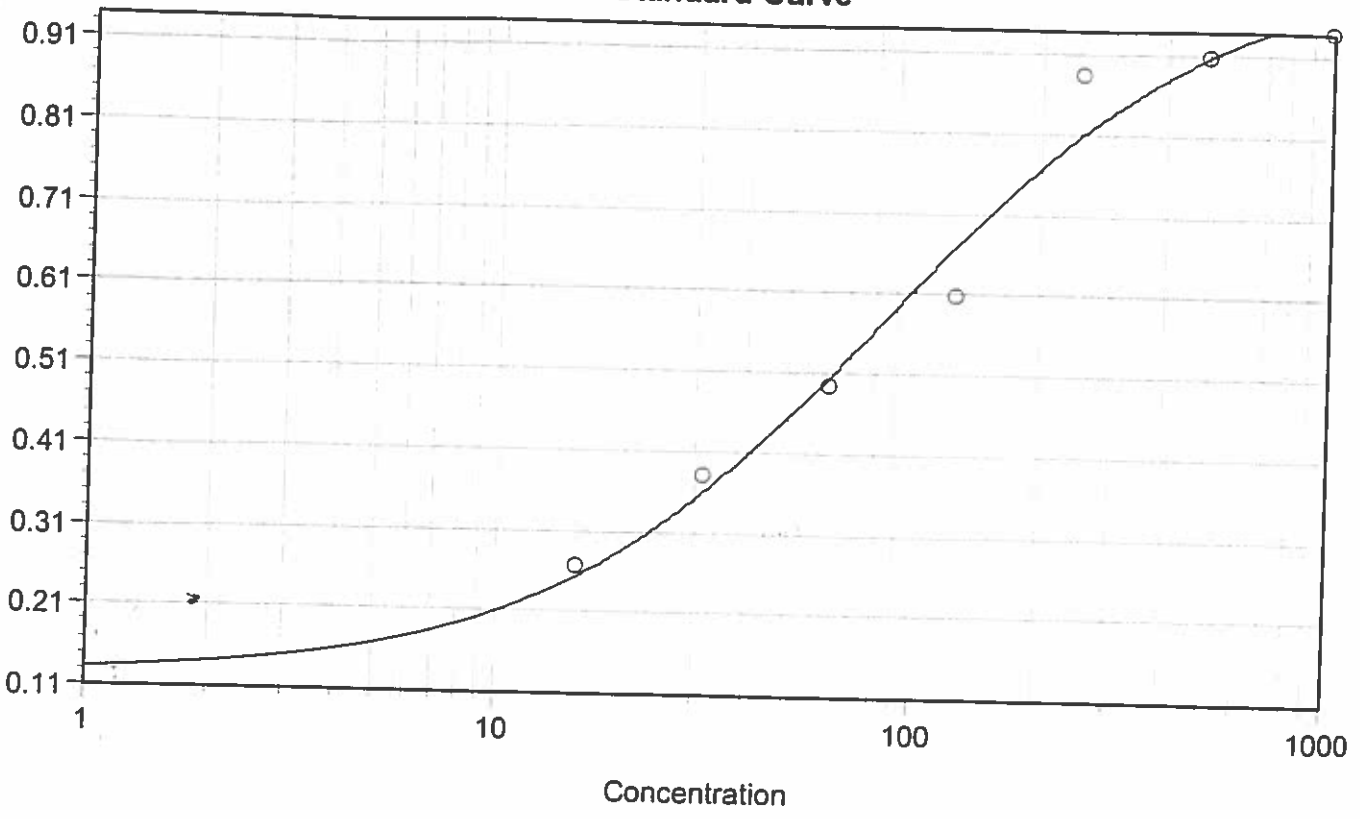

4-P Fit:  $y = (A - D) / (1 + (x/C)^B) + D$

Std (Standards: Concentration vs MeanValue)

| A     | B    | C    | D    | R <sup>2</sup> |
|-------|------|------|------|----------------|
| 0.124 | 1.06 | 83.7 | 1.02 | 0.984          |

Weighting: Fixed

Pearson correlation  
↓  
correlate  
↓  
Bivariate  
↓  
Pearson  
↓  
Variables  
OK
